# Supplementary material
Source: Springer Nature journal article supplement (https://www.springermedizin.de/resource/supplementary/13049_2013_729_MOESM2_ESM.pdf/9667238)
Supplement: MOESM2 [file 9667238]

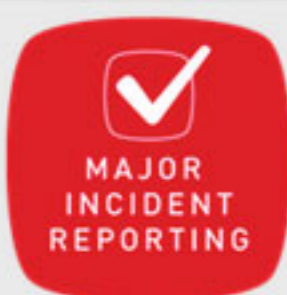
[Home](#)
[Editorial](#)
[Instructions](#)
[Reports](#)
[Contact](#)
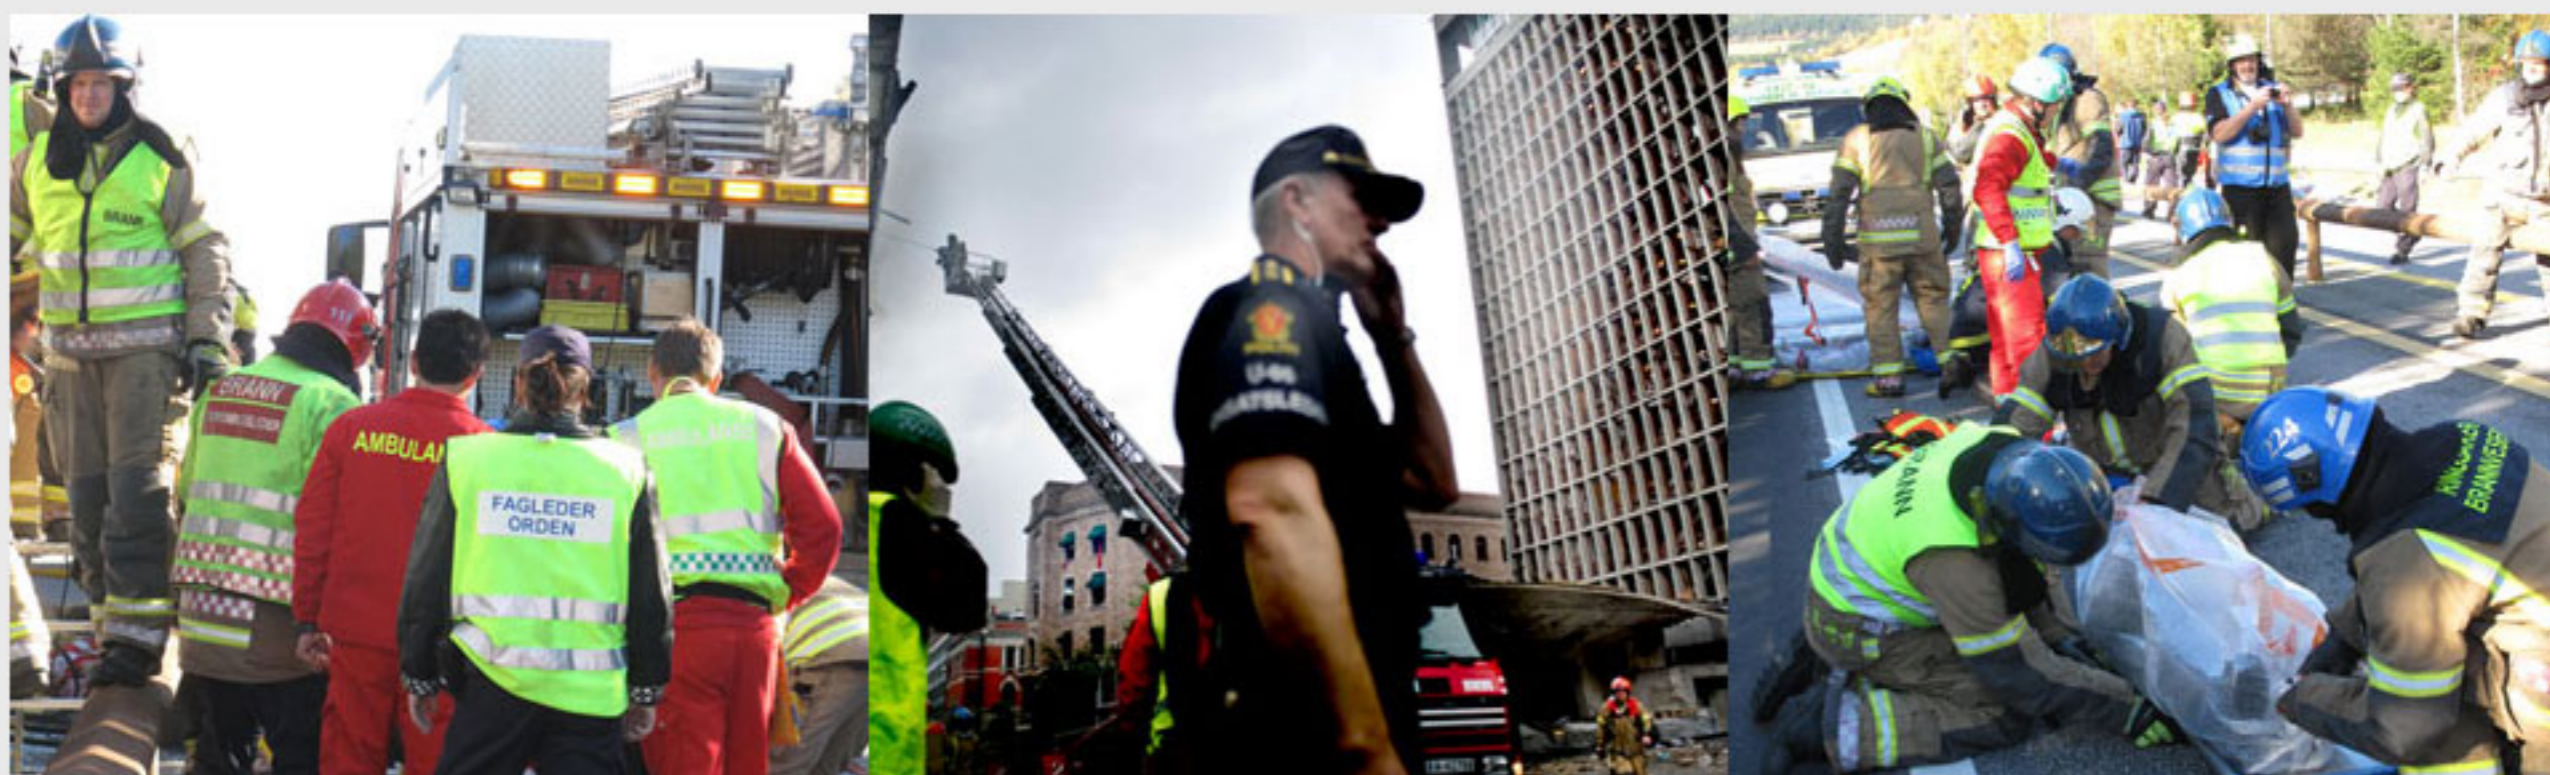
[ACCESS PUBLISHED REPORTS](#)
[SUBMIT A REPORT](#)
[REGISTER TO SUBMIT A REPORT](#)

### ***The consensus based template for reporting...***

..from the pre-hospital medical management after a major incident is freely available on this webpage. If you have been part of the medical response to or management of a major incident, you are encouraged to **register to submit a report** from the incident. You will receive a username and password to start your online submission process.

## The template

The consensus based template for reporting from the pre-hospital medical management after a major incident was developed using a **modified nominal group technique**. The template will be tested for feasibility and revised in collaboration with leading experts in the field. Download the open access template directly from this webpage.

[more](#)

## The results

You may **freely download the template** and use it as you find suitable. We encourage all authors to submit their reports on the site [www.majorincidentreporting.org](http://www.majorincidentreporting.org) and thereby contribute to create an international open access database. All submitted reports will be eligible for a yearly summary in the **Scandinavian Journal of Trauma, Resuscitation and Emergency Medicine**, and particularly informative reports will be considered for publication in full-version.

## Instructions to authors

Once you **register to submit a report**, you will (if the report is approved) be authorized with a username and password. Follow the **template** and collect the necessary data before starting the on-line submission. To facilitate the process, a check-list is available

[more](#)

Sponsored by:

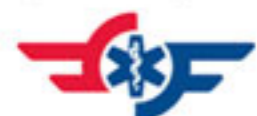

**NORSK LUFTAMBULANSE**  
NORWEGIAN AIR AMBULANCE

Endorsing societies:

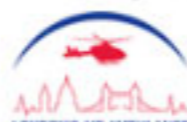

LONDON'S AIR AMBULANCE

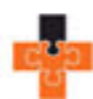

Norwegian Trauma Competency Service

Sign up for our newsletter

[Liker](#)

46

[Tweet](#)

13

[Pin it](#)

[Share](#)
